# Supplementary material for: Mass landscapes of seven scorpion species: The first analyses of Australian species with 1,5-DAN matrix
Source: PubMed Central journal article supplement — J Venom Res. 2012 Oct 23;3:7–14. (PMC3518322), 2012-10-23
Supplement: JVR-03-007-supplementary.pdf [file JVR-03-007-supplementary.pdf]

## RESEARCH REPORT

**Supplementary Table 1.** Total list of *Urodacus elongatus* masses observed, [M] listed. Average masses shown with a proceeding 'a.'

|        |         |         |         |         |         |         |           |
|--------|---------|---------|---------|---------|---------|---------|-----------|
| 374.21 | 991.61  | 1278.80 | 1689.90 | 2339.34 | 2826.26 | 3969.83 | 5287.79   |
| 428.27 | 1004.56 | 1284.76 | 1693.02 | 2357.35 | 2893.46 | 3980.12 | 5306.81   |
| 444.36 | 1008.48 | 1289.64 | 1695.88 | 2358.46 | 2953.67 | 4054.53 | 5493.82   |
| 466.29 | 1009.85 | 1297.76 | 1698.13 | 2362.25 | 2957.41 | 4072.98 | 5555.57   |
| 484.19 | 1022.50 | 1298.70 | 1711.87 | 2372.27 | 2958.61 | 4074.21 | 5557.61   |
| 492.36 | 1028.64 | 1299.80 | 1714.04 | 2375.32 | 2969.59 | 4091.07 | 5716.68   |
| 502.29 | 1031.61 | 1302.73 | 1731.79 | 2378.08 | 3049.87 | 4105.12 | 5845.19   |
| 514.29 | 1032.61 | 1320.72 | 1753.16 | 2382.38 | 3094.63 | 4124.05 | 5868.87   |
| 544.32 | 1033.43 | 1344.83 | 1811.86 | 2418.44 | 3112.28 | 4165.22 | 6051.06   |
| 557.12 | 1044.52 | 1351.62 | 1831.01 | 2428.47 | 3116.96 | 4171.66 | 6304.14   |
| 567.12 | 1046.60 | 1436.67 | 1859.07 | 2433.21 | 3153.80 | 4186.21 | 6342.68   |
| 576.26 | 1063.64 | 1446.84 | 1912.19 | 2435.49 | 3198.53 | 4263.17 | 6392.27   |
| 615.38 | 1078.51 | 1447.81 | 1915.15 | 2505.48 | 3256.95 | 4305.37 | 6455.97   |
| 636.28 | 1085.58 | 1466.80 | 1926.86 | 2521.48 | 3292.87 | 4453.43 | 6553.27   |
| 664.27 | 1102.63 | 1472.92 | 1952.13 | 2533.29 | 3329.52 | 4484.62 | 7338.35   |
| 677.33 | 1124.60 | 1485.78 | 1986.27 | 2534.43 | 3514.13 | 4533.44 | 7547.89   |
| 759.45 | 1146.22 | 1503.02 | 2014.88 | 2548.44 | 3553.80 | 4599.45 | 7864.84   |
| 770.46 | 1150.58 | 1503.79 | 2043.13 | 2549.58 | 3566.73 | 4694.50 | 7880.81   |
| 777.43 | 1155.65 | 1522.00 | 2054.22 | 2565.42 | 3571.67 | 4711.84 | 7963.70   |
| 858.56 | 1165.82 | 1528.91 | 2072.35 | 2571.42 | 3611.82 | 4797.23 | 8458.36   |
| 873.45 | 1210.82 | 1530.90 | 2106.00 | 2588.25 | 3627.23 | 4798.24 | 8456.20   |
| 874.45 | 1211.71 | 1537.98 | 2123.03 | 2607.32 | 3773.81 | 4841.61 | 8592.99   |
| 883.27 | 1215.75 | 1560.81 | 2148.18 | 2658.52 | 3839.84 | 4864.29 | 8612.44a  |
| 885.97 | 1216.70 | 1567.69 | 2172.23 | 2676.67 | 3852.05 | 4911.90 | 8694.54a  |
| 892.01 | 1226.45 | 1593.92 | 2241.43 | 2692.32 | 3865.86 | 4959.68 | 10194.99a |
| 914.46 | 1227.64 | 1598.84 | 2257.44 | 2695.51 | 3873.14 | 5027.50 | 11696.54a |
| 915.58 | 1228.82 | 1602.81 | 2264.37 | 2742.03 | 3900.88 | 5037.01 |           |
| 955.52 | 1232.75 | 1628.83 | 2273.15 | 2758.08 | 3916.60 | 5080.68 |           |
| 967.42 | 1236.69 | 1638.73 | 2311.34 | 2759.08 | 3926.85 | 5087.61 |           |
| 976.04 | 1237.52 | 1646.82 | 2319.34 | 2796.64 | 3931.16 | 5096.88 |           |
| 987.53 | 1260.75 | 1649.91 | 2320.35 | 2809.38 | 3942.87 | 5214.69 |           |

**Supplementary Table 2.** Total list of *Urodacus yaschekoi* masses observed, [M] listed. Average masses shown with a proceeding 'a.'

|        |        |         |         |         |         |         |         |         |          |
|--------|--------|---------|---------|---------|---------|---------|---------|---------|----------|
| 402.27 | 670.96 | 963.44  | 1285.50 | 1602.77 | 2133.01 | 3039.60 | 4012.44 | 4515.41 | 6327.59  |
| 404.24 | 672.42 | 969.58  | 1297.98 | 1603.03 | 2144.22 | 3099.55 | 4035.41 | 4519.58 | 6329.59  |
| 407.23 | 706.44 | 971.52  | 1302.86 | 1606.17 | 2155.14 | 3107.31 | 4051.38 | 4520.28 | 6334.67  |
| 408.21 | 716.40 | 983.66  | 1303.69 | 1607.80 | 2173.91 | 3115.42 | 4065.62 | 4595.16 | 6460.01  |
| 428.34 | 718.39 | 991.49  | 1319.76 | 1649.58 | 2261.11 | 3134.54 | 4071.46 | 4638.84 | 6462.02  |
| 436.27 | 730.46 | 992.61  | 1322.59 | 1651.77 | 2262.19 | 3164.90 | 4078.45 | 4666.17 | 6535.68  |
| 443.31 | 760.46 | 1007.47 | 1324.56 | 1668.19 | 2280.13 | 3189.53 | 4082.92 | 4760.54 | 6560.00  |
| 446.25 | 770.52 | 1012.73 | 1334.89 | 1685.22 | 2310.59 | 3272.35 | 4083.93 | 4767.51 | 5305.91a |
| 461.26 | 788.52 | 1019.63 | 1340.88 | 1697.78 | 2328.94 | 3295.95 | 4088.21 | 4779.67 | 5781.58a |
| 462.84 | 789.54 | 1021.63 | 1355.77 | 1698.13 | 2334.12 | 3329.47 | 4090.91 | 4792.11 | 5971.99a |
| 465.23 | 792.39 | 1031.63 | 1379.70 | 1714.79 | 2345.00 | 3347.50 | 4123.96 | 4796.04 | 6572.73  |

(Continued)

Supplementary Table 2. Continued

|        |        |         |         |         |         |         |         |          |          |
|--------|--------|---------|---------|---------|---------|---------|---------|----------|----------|
| 475.28 | 816.43 | 1032.50 | 1382.54 | 1730.91 | 2347.23 | 3411.52 | 4125.03 | 4866.24  | 6590.76  |
| 489.27 | 822.49 | 1038.58 | 1384.01 | 1738.74 | 2443.84 | 3424.64 | 4134.22 | 4610.04a | 6651.70a |
| 492.34 | 841.48 | 1076.58 | 1385.77 | 1743.78 | 2455.75 | 3440.59 | 4136.67 | 4964.19  | 6689.79  |
| 499.34 | 842.42 | 1078.47 | 1391.91 | 1744.20 | 2468.30 | 3495.76 | 4141.83 | 5051.30  | 7887.96a |
| 502.33 | 844.55 | 1102.75 | 1395.73 | 1760.89 | 2473.00 | 3496.59 | 4145.44 | 5063.11  | 7893.35a |
| 503.28 | 849.51 | 1117.77 | 1419.72 | 1764.81 | 2507.07 | 3526.96 | 4162.33 | 5064.12  | 7896.29  |
| 522.33 | 851.50 | 1119.80 | 1423.58 | 1796.80 | 2534.69 | 3602.66 | 4164.77 | 5086.68  | 7902.10a |
| 528.33 | 855.53 | 1133.80 | 1432.08 | 1818.74 | 2539.34 | 3625.00 | 4223.01 | 5116.35  | 8348.99a |
| 532.31 | 858.46 | 1134.74 | 1432.94 | 1826.88 | 2583.95 | 3645.00 | 4246.47 | 5188.77  | 8447.06a |
| 545.32 | 860.59 | 1161.64 | 1442.06 | 1873.65 | 2609.05 | 3695.74 | 4263.74 | 5198.35  | 8474.33a |
| 554.41 | 861.51 | 1165.59 | 1453.71 | 1914.85 | 2621.10 | 3696.69 | 4269.40 | 5220.37  | 8509.99a |
| 559.35 | 867.58 | 1166.48 | 1474.71 | 1915.31 | 2626.21 | 3716.67 | 4283.04 | 5257.85  | 8547.69a |
| 560.34 | 871.42 | 1173.83 | 1476.72 | 1920.92 | 2673.24 | 3759.34 | 4309.04 | 5261.42  | 8572.39a |
| 574.36 | 886.64 | 1177.75 | 1482.85 | 1941.42 | 2713.42 | 3766.77 | 4310.17 | 5336.78  | 8595.62  |
| 591.03 | 890.54 | 1185.83 | 1487.63 | 1947.99 | 2724.38 | 3834.76 | 4351.87 | 5378.38  | 8602.31a |
| 593.35 | 891.91 | 1188.82 | 1489.96 | 1955.45 | 2739.41 | 3853.90 | 4363.90 | 5398.88  |          |
| 601.37 | 892.59 | 1193.84 | 1518.44 | 1973.86 | 2799.25 | 3880.64 | 4364.48 | 5407.79  |          |
| 615.41 | 906.64 | 1207.82 | 1522.71 | 1987.14 | 2841.47 | 3899.71 | 4379.89 | 5440.41  |          |
| 630.39 | 916.65 | 1210.59 | 1540.88 | 2060.79 | 2925.14 | 3924.92 | 4408.11 | 5541.37  |          |
| 631.39 | 922.53 | 1222.82 | 1571.81 | 2067.06 | 2940.56 | 3951.83 | 4409.10 | 5647.42  |          |
| 634.40 | 930.48 | 1225.66 | 1574.49 | 2078.21 | 2958.28 | 3965.37 | 4422.49 | 5764.98  |          |
| 635.42 | 945.52 | 1239.85 | 1586.09 | 2099.92 | 2959.07 | 3979.78 | 4432.56 | 5808.51  |          |
| 645.40 | 952.40 | 1256.57 | 1592.07 | 2100.40 | 2983.26 | 3980.31 | 4434.60 | 5838.56  |          |
| 647.36 | 958.63 | 1278.62 | 1592.95 | 2126.08 | 2984.24 | 4009.36 | 4477.24 | 5938.45  |          |

Supplementary Table 3. Total list of *Urodacus armatus* masses observed, [M] listed. Average masses shown with a preceding 'a.'

|        |         |         |         |         |          |         |         |          |
|--------|---------|---------|---------|---------|----------|---------|---------|----------|
| 293.23 | 631.35  | 1053.72 | 1454.69 | 2302.65 | 3407.56  | 4263.35 | 4866.31 | 6607.34  |
| 403.28 | 645.36  | 1120.51 | 1463.69 | 2340.19 | 3439.53  | 4327.10 | 4925.85 | 6591.34  |
| 436.25 | 647.32  | 1155.69 | 1515.67 | 2385.05 | 3442.97  | 4327.52 | 5035a   | 7887.80a |
| 444.31 | 673.99  | 1171.70 | 1542.73 | 2526.15 | 3470.99  | 4397.13 | 5051.37 | 7896.35  |
| 461.24 | 745.37  | 1173.72 | 1550.66 | 2558.23 | 3545.94  | 4398.58 | 5052.10 | 7920.66  |
| 465.21 | 789.34  | 1177.64 | 1602.92 | 2619.16 | 3624.65  | 4433.13 | 5054.85 | 8548a    |
| 492.32 | 828.24  | 1210.81 | 1661.83 | 2626.13 | 3729.29  | 4449.13 | 5198.29 | 8463.71  |
| 502.30 | 844.50  | 1216.51 | 1735.49 | 2629.27 | 3758.08  | 4450.51 | 5261.98 | 8472.93  |
| 512.02 | 845.47  | 1217.63 | 1753.82 | 2724.34 | 3892.05  | 4466.25 | 5262.49 | 8473.57  |
| 522.30 | 860.52  | 1225.64 | 1765.89 | 2924.40 | 3935.34  | 4480a   | 5398.99 | 8552.70  |
| 532.28 | 884.56  | 1233.63 | 1809.85 | 2958.17 | 3965.24  | 4500a   | 5468.04 | 8600.84  |
| 545.50 | 916.42  | 1279.92 | 1873.07 | 2976.23 | 3979.93  | 4542.42 | 5801.09 | 8651.42  |
| 555.39 | 982.38  | 1286.62 | 1936.97 | 2983.05 | 4009.95  | 4595.69 | 5999a   |          |
| 559.25 | 1001.55 | 1340.77 | 1973.77 | 2985.08 | 4082.73  | 4608.23 | 6329.15 |          |
| 572.97 | 1021.39 | 1419.67 | 1984.00 | 2986.45 | 4165.27  | 4618.17 | 6460.24 |          |
| 574.33 | 1021.54 | 1434.71 | 2039.98 | 3003.38 | 3297.15a | 4633.24 | 6398a   |          |
| 597.78 | 1027.44 | 1435.39 | 2207.01 | 3099.54 | 3485a    | 4767.90 | 6579a   |          |
| 602.32 | 1027.62 | 1448.66 | 2261.13 | 3192.48 | 4165.40  | 4815.48 | 6595.8a |          |
| 615.38 | 1028.62 | 1450.61 | 2280.03 | 3329.51 | 4429a    | 4815.57 | 6463.44 |          |

**Supplementary Table 4.** Total list of *Lychas marmoreus obscurus* masses observed, [M] listed. Average masses shown with a proceeding 'a.'

|         |         |         |         |         |         |         |          |           |
|---------|---------|---------|---------|---------|---------|---------|----------|-----------|
| 840.11  | 1180.38 | 1493.68 | 1798.02 | 2131.95 | 2679.35 | 3597.94 | 4400.94  | 7379.00a  |
| 876.08  | 1184.61 | 1495.62 | 1801.80 | 2136.81 | 2687.34 | 3612.34 | 4530.67  | 7417.19   |
| 567.13  | 1186.49 | 1502.76 | 1803.69 | 2155.15 | 2710.01 | 3622.77 | 4579.84  | 7439.34   |
| 689.48  | 1187.66 | 1511.71 | 1822.88 | 2200.81 | 2716.14 | 3623.64 | 4580.17  | 7445.80a  |
| 922.46  | 1194.50 | 1521.62 | 1836.93 | 2249.88 | 2727.46 | 3639.65 | 4602.28  | 7456.22   |
| 591.09  | 1199.57 | 1525.76 | 1839.79 | 2251.18 | 2741.96 | 3862.44 | 4635.87  | 7497.89   |
| 840.08  | 1216.51 | 1526.54 | 1843.64 | 2262.23 | 2742.24 | 3888.62 | 4868.46  | 7516.14   |
| 993.16  | 1224.05 | 1538.42 | 1862.83 | 2280.80 | 2783.31 | 3889.48 | 5010.00  | 7521.47   |
| 827.51  | 1225.36 | 1542.50 | 1869.04 | 2295.95 | 2784.36 | 3906.62 | 5079.09  | 7546.05   |
| 976.54  | 1230.73 | 1546.73 | 1883.03 | 2320.09 | 2870.56 | 3945.49 | 5081.41  | 7547.05a  |
| 968.57  | 1241.27 | 1547.95 | 1887.09 | 2327.87 | 3126.69 | 3962.87 | 5082.04  | 7596.42   |
| 1015.56 | 1242.61 | 1550.64 | 1914.93 | 2331.87 | 3180.80 | 3980.99 | 5287.09  | 7626.00a  |
| 1016.59 | 1243.50 | 1568.55 | 1916.96 | 2344.89 | 3187.54 | 3991.84 | 5374.18  | 7672.40   |
| 1019.41 | 1251.66 | 1574.68 | 1917.85 | 2364.23 | 3203.53 | 3992.97 | 6070.14  | 7674.00a  |
| 1020.46 | 1257.60 | 1585.46 | 1922.90 | 2366.99 | 3204.56 | 3993.87 | 6185.36  | 7686.13   |
| 1022.50 | 1258.68 | 1596.66 | 1923.90 | 2368.12 | 3231.54 | 4003.56 | 6241.67  | 7691.14a  |
| 1030.45 | 1287.30 | 1603.73 | 1935.75 | 2378.08 | 3232.12 | 4074.23 | 6402.59  | 7756.03a  |
| 1044.48 | 1294.49 | 1609.80 | 1938.99 | 2404.23 | 3245.50 | 4078.94 | 6441.56  | 7767.29a  |
| 1057.35 | 1300.89 | 1614.68 | 1944.95 | 2405.97 | 3251.12 | 4079.79 | 6442.87  | 7809.47   |
| 1062.47 | 1305.60 | 1617.56 | 1945.09 | 2421.90 | 3262.16 | 4113.79 | 6620.14  | 7813.10a  |
| 1065.42 | 1317.74 | 1622.68 | 1962.05 | 2442.28 | 3315.64 | 4115.16 | 6652.19  | 7825.52   |
| 1069.39 | 1318.72 | 1630.87 | 2000.07 | 2462.32 | 3331.89 | 4122.75 | 6736.56  | 7842.45   |
| 1073.50 | 1329.62 | 1635.81 | 2003.68 | 2468.25 | 3360.23 | 4128.74 | 6816.00  | 7846.22a  |
| 1079.44 | 1339.57 | 1639.66 | 2016.05 | 2482.08 | 3361.27 | 4148.08 | 6832.03  | 7850.92a  |
| 1080.94 | 1342.58 | 1651.67 | 2019.81 | 2483.32 | 3373.64 | 4150.02 | 7028.11  | 7870.08a  |
| 1086.61 | 1354.82 | 1653.64 | 2023.07 | 2485.97 | 3378.56 | 4153.80 | 7050.20  | 7879.10   |
| 1090.53 | 1355.62 | 1658.57 | 2025.80 | 2491.29 | 3393.47 | 4157.99 | 7050.81  | 7898.05   |
| 1091.59 | 1359.56 | 1660.88 | 2038.69 | 2507.92 | 3397.72 | 4159.68 | 7055.36a | 7980.93a  |
| 1108.61 | 1371.35 | 1667.82 | 2042.07 | 2511.28 | 3401.56 | 4164.99 | 7143.16  | 8101.60   |
| 1115.46 | 1374.78 | 1677.75 | 2045.83 | 2525.26 | 3413.17 | 4170.86 | 7152.07  | 8344.85a  |
| 1120.43 | 1386.77 | 1689.75 | 2063.87 | 2530.16 | 3446.44 | 4173.13 | 7152.85  | 8360.84a  |
| 1124.66 | 1396.51 | 1694.86 | 2065.96 | 2565.19 | 3477.55 | 4201.82 | 7156.13  | 8441.15a  |
| 1130.59 | 1398.63 | 1697.65 | 2072.98 | 2570.16 | 3494.56 | 4215.69 | 7170.88  | 8528a     |
| 1136.48 | 1415.74 | 1699.81 | 2084.94 | 2583.95 | 3495.53 | 4219.84 | 7172.19  | 8549a     |
| 1137.49 | 1423.70 | 1703.68 | 2091.09 | 2587.27 | 3511.56 | 4223.59 | 7235.88  | 15032.86a |
| 1139.69 | 1427.56 | 1704.79 | 2092.31 | 2588.34 | 3524.61 | 4224.92 | 7241.45a |           |
| 1152.42 | 1428.46 | 1706.85 | 2101.72 | 2614.37 | 3549.46 | 4231.82 | 7259.90a |           |
| 1161.87 | 1436.47 | 1711.00 | 2106.12 | 2621.98 | 3550.54 | 4253.55 | 7291.93  |           |
| 1170.62 | 1468.66 | 1724.91 | 2108.14 | 2644.37 | 3572.62 | 4253.81 | 7296.44a |           |
| 1173.49 | 1482.81 | 1760.86 | 2115.01 | 2645.31 | 3580.52 | 4351.60 | 7334.97  |           |
| 1174.54 | 1488.60 | 1781.73 | 2117.70 | 2651.96 | 3584.45 | 4352.00 | 7375.20  |           |

**Supplementary Table 5.** Total list of *Opisthacanthus glabrifrons* masses observed, [M] listed. Average masses shown with a proceeding 'a.'

|        |         |         |         |         |          |         |         |          |
|--------|---------|---------|---------|---------|----------|---------|---------|----------|
| 354.50 | 1218.60 | 1552.02 | 2431.74 | 3002a   | 3361.60  | 3953.66 | 4775a   | 6051a    |
| 371.14 | 1222.82 | 1557.70 | 2513.20 | 3016.44 | 3391.92  | 3977.44 | 4784a   | 6428a    |
| 408.49 | 1228.89 | 1563.08 | 2546.90 | 3021.95 | 3443.60  | 3999.72 | 4817.22 | 7819a    |
| 409.25 | 1237.84 | 1602.70 | 2558.42 | 3054.08 | 3458.85  | 4053.00 | 4844a   | 7922.07a |
| 444.16 | 1255.90 | 1619.08 | 2567.20 | 3058.57 | 3495.18  | 4056.78 | 4855.29 | 8047.79a |
| 461.28 | 1260.60 | 1621.70 | 2577.94 | 3067.73 | 3540.89a | 4064.73 | 4866.68 | 8059a    |

(Continued)

**Supplementary Table 5.** Continued

|         |         |         |         |         |         |          |          |           |
|---------|---------|---------|---------|---------|---------|----------|----------|-----------|
| 503.29  | 1290.70 | 1626.80 | 2586.20 | 3068.10 | 3570a   | 4120a    | 4868.38  | 8210a     |
| 518.18  | 1316.91 | 1640.80 | 2590.62 | 3068.50 | 3581a   | 4132.94  | 4871.20a | 8479.21a  |
| 522.34  | 1344.97 | 1673.01 | 2594.79 | 3075.52 | 3590a   | 4134.70  | 4933a    | 8481.03a  |
| 528.32  | 1380.60 | 1688.80 | 2606.74 | 3078.74 | 3595.95 | 4135.51  | 5028.40  | 8492a     |
| 535.22  | 1397.60 | 1775.30 | 2611.34 | 3081.58 | 3618a   | 4161a    | 5042.73  | 8494.85a  |
| 545.32  | 1401.70 | 1801.90 | 2640.20 | 3086.90 | 3636.00 | 4188.06  | 5068.49  | 8567.47a  |
| 549.38  | 1403.80 | 1821.25 | 2643.56 | 3088.55 | 3653.59 | 4215a    | 5076a    | 9019.57   |
| 609.25  | 1407.88 | 1923.90 | 2658.30 | 3089.68 | 3659.04 | 4239.14  | 5124.76  | 9024.22a  |
| 775.52  | 1408.88 | 1933.37 | 2678.00 | 3091.58 | 3664.23 | 4258.64  | 5131.39  | 9041a     |
| 783.67  | 1427.00 | 1941.90 | 2698.20 | 3099.40 | 3705.90 | 4272a    | 5137.22  | 11670a    |
| 802.54  | 1427.70 | 1955.00 | 2706.48 | 3134.53 | 3742.55 | 4295.14  | 5182.49  | 11843a    |
| 816.54  | 1429.03 | 1958.49 | 2714.57 | 3150.09 | 3767.06 | 4310.55  | 5196.91  | 12375a    |
| 836.40  | 1450.01 | 2016.00 | 2745.20 | 3153.48 | 3770.30 | 4452.61  | 5197.66  | 12213a    |
| 925.60  | 1453.01 | 2078.29 | 2752.70 | 3175.50 | 3777.26 | 4511.51  | 5213.85  | 13861.60a |
| 949.50  | 1461.81 | 2136.59 | 2768.38 | 3190a   | 3783.21 | 4525.35  | 5257.50  | 14026.67a |
| 1021.71 | 1471.80 | 2228.20 | 2800.83 | 3200a   | 3815.68 | 4543a    | 5271.79  |           |
| 1085.77 | 1473.05 | 2245.42 | 2826.71 | 3236.66 | 3857.99 | 4577.16  | 5330a    |           |
| 1094.70 | 1474.80 | 2264.34 | 2839.30 | 3254.77 | 3858.68 | 4583.55  | 5378.9a  |           |
| 1105.60 | 1499.02 | 2290.34 | 2852.86 | 3275a   | 3859.21 | 4592.05a | 5391a    |           |
| 1116.77 | 1515.10 | 2317.80 | 2859.21 | 3293a   | 3870.97 | 4644.24  | 5442.56  |           |
| 1117.74 | 1529.05 | 2321.41 | 2868.85 | 3340.30 | 3874.63 | 4657.57  | 5481.71  |           |
| 1190.80 | 1531.04 | 2362.52 | 2874.86 | 3341.51 | 3880.50 | 4675.66  | 5671a    |           |
| 1193.80 | 1536.03 | 2373.36 | 2882.87 | 3343.84 | 3909.08 | 4692.00  | 5747.39a |           |
| 1203.81 | 1545.11 | 2389.41 | 2999.40 | 3351.66 | 3914.22 | 4721a    | 5845.90  |           |

**Supplementary Table 6.** Total list of *Pandinus imperator* masses observed, [M] listed. Average masses shown with a preceding 'a.'

|         |         |         |         |         |          |          |          |           |
|---------|---------|---------|---------|---------|----------|----------|----------|-----------|
| 635.44  | 1466.17 | 1831.35 | 2615.40 | 3115.49 | 3336.52  | 3756.74  | 5100.50  | 8898.10a  |
| 1039.82 | 1490.07 | 1858.10 | 2632.30 | 3124.69 | 3384.67  | 3828.90  | 5326.31  | 8912.75a  |
| 1085.81 | 1497.04 | 1918.39 | 2685.50 | 3140.26 | 3390.84  | 3832.52  | 6276.19a | 9066.41a  |
| 1152.91 | 1511.80 | 1992.10 | 2825.91 | 3150.30 | 3476.93  | 3902.45  | 6346.61a | 12437.72a |
| 1177.81 | 1529.05 | 2001.00 | 2882.20 | 3178.60 | 3477.80  | 4031.75  | 6581.51  |           |
| 1207.83 | 1538.13 | 2109.80 | 2909.95 | 3193.45 | 3480.62  | 4156.28a | 6585.96  |           |
| 1264.85 | 1546.15 | 2208.90 | 2925.40 | 3204.30 | 3497.65a | 4161.51  | 6597.44  |           |
| 1320.93 | 1567.90 | 2214.48 | 2938.10 | 3205.30 | 3505.38  | 4175.62  | 6598.41  |           |
| 1333.91 | 1571.15 | 2248.53 | 2965.60 | 3214.81 | 3547.68  | 4178.80  | 7859.84a |           |
| 1353.08 | 1581.80 | 2273.30 | 2977.98 | 3234.52 | 3550.63  | 4279.78  | 8160.36a |           |
| 1385.99 | 1606.08 | 2426.40 | 2978.83 | 3239.64 | 3565.86  | 4280.42  | 8186.65a |           |
| 1403.03 | 1684.26 | 2464.64 | 3000.00 | 3240.14 | 3641.70  | 4421.56  | 8349.32a |           |
| 1424.80 | 1694.25 | 2485.40 | 3030.48 | 3299.28 | 3675.92a | 4797.37  | 8352.22a |           |
| 1433.04 | 1738.18 | 2525.38 | 3079.39 | 3331.25 | 3721.43  | 4860.97  | 8396.42a |           |
| 1450.01 | 1748.10 | 2578.30 | 3099.58 | 3331.77 | 3745.10  | 5098.55  | 8883.54a |           |

**Supplementary Table 7.** Total list of *Vaejovis spinigerus* masses observed, [M] listed. Average masses shown with a proceeding 'a.'

|        |         |         |         |         |         |         |          |          |           |
|--------|---------|---------|---------|---------|---------|---------|----------|----------|-----------|
| 351.19 | 783.50  | 1225.70 | 1618.06 | 2237.58 | 2712.40 | 3556.7a | 4155.72  | 4728.12  | 7811.46a  |
| 401.27 | 784.56  | 1236.95 | 1632.09 | 2245.50 | 2728.40 | 3637.23 | 4156.10  | 4743.17  | 7829a     |
| 422.26 | 829.57  | 1248.97 | 1661.04 | 2249.49 | 2739a   | 3645.30 | 4162.52  | 4832.41  | 7941a     |
| 430.28 | 838.49  | 1264.74 | 1666.27 | 2253.50 | 2751.84 | 3646.01 | 4188.21  | 4850.93  | 7977.60   |
| 431.26 | 847.51  | 1265.71 | 1669.90 | 2266.30 | 2756.68 | 3658a   | 4189.71  | 4912.73  | 7983.38a  |
| 432.25 | 849.63  | 1278.89 | 1676.36 | 2277.46 | 2774.68 | 3669.30 | 4192.73  | 4937a    | 8087a     |
| 460.30 | 861.66  | 1285.86 | 1692.25 | 2295.80 | 2792.66 | 3669.59 | 4196.18  | 4972.64  | 8129a     |
| 471.36 | 886.64  | 1292.77 | 1725.20 | 2301.87 | 2794.10 | 3670.00 | 4196.63  | 4989.71  | 8273.77a  |
| 488.31 | 900.44  | 1293.96 | 1740.21 | 2312.68 | 2800.84 | 3671.66 | 4203.74  | 4990.47  | 8782.45a  |
| 513.41 | 905.53  | 1304.82 | 1746.14 | 2343.82 | 2811.72 | 3672.30 | 4204.55  | 5008a    | 8287.57   |
| 528.35 | 911.66  | 1304.92 | 1751.14 | 2373.41 | 2814.18 | 3673.03 | 4205.06  | 5046.38  | 9065.66a  |
| 529.37 | 918.56  | 1309.71 | 1764.16 | 2423.74 | 2944.94 | 3703.30 | 4205.70  | 5047.71  | 9082.55a  |
| 531.34 | 919.67  | 1310.60 | 1777.90 | 2440.80 | 2962.96 | 3704.02 | 4205.71  | 5058.30  | 9115a     |
| 532.33 | 971.49  | 1349.84 | 1783.80 | 2441.73 | 2997.84 | 3712.72 | 4208.09  | 5153.71a | 13690a    |
| 544.36 | 974.71  | 1353.07 | 1860.46 | 2478.91 | 3028.59 | 3732.40 | 4212.51  | 5166.34  | 11248a    |
| 556.32 | 975.64  | 1362.96 | 1865.29 | 2493.60 | 3076.89 | 3733.18 | 4223.58  | 5179.69  | 11925a    |
| 559.38 | 977.16  | 1373.93 | 1867.20 | 2512.79 | 3078.32 | 3756.95 | 4257.78  | 5223a    | 14203.35a |
| 586.40 | 980.50  | 1375.03 | 1880.20 | 2525.37 | 3094.32 | 3797.70 | 4258.60  | 5262.33  | 15105.37a |
| 589.37 | 991.64  | 1389.06 | 1881.19 | 2530.87 | 3099.60 | 3801.88 | 4265.65  | 5461.51  | 15413.58a |
| 601.41 | 1022.50 | 1397.70 | 1886.38 | 2540.84 | 3107.57 | 3817.38 | 4276.28  | 5574.63  |           |
| 603.37 | 1029.51 | 1407.06 | 1896.24 | 2560.95 | 3140.01 | 3821.92 | 4325.73  | 5592a    |           |
| 619.29 | 1033.67 | 1421.10 | 1902.90 | 2564.91 | 3220.39 | 3831.32 | 4343.77  | 5646.68  |           |
| 624.42 | 1062.67 | 1422.95 | 1905.35 | 2565.71 | 3283.93 | 3851.66 | 4347a    | 5784a    |           |
| 632.36 | 1068.60 | 1425.89 | 1934.13 | 2592.79 | 3300.43 | 3854.80 | 4356.99  | 5799.99  |           |
| 639.43 | 1068.81 | 1428.80 | 1943.34 | 2614.13 | 3342.38 | 3879.33 | 4381.66  | 5801.58  |           |
| 644.30 | 1083.72 | 1432.90 | 1959.54 | 2619.10 | 3353.35 | 3909.65 | 4385.92  | 5875.58  |           |
| 648.47 | 1104.71 | 1438.13 | 1960.55 | 2621.10 | 3366.82 | 3920.99 | 4391.00  | 5890a    |           |
| 657.44 | 1110.73 | 1439.09 | 2049.47 | 2632.98 | 3385.31 | 3923.51 | 4412a    | 6036a    |           |
| 659.46 | 1114.50 | 1444.88 | 2068.44 | 2633.40 | 3394.48 | 3937.85 | 4443.02a | 6189.96  |           |
| 669.41 | 1131.83 | 1486.84 | 2090.66 | 2640.86 | 3402a   | 3953.31 | 4464.19  | 6288a    |           |
| 678.90 | 1138.73 | 1518.80 | 2106.20 | 2641.30 | 3410.50 | 3955.54 | 4483a    | 6413.39  |           |
| 680.90 | 1148.85 | 1521.08 | 2153.68 | 2653.84 | 3435a   | 3972a   | 4506.41  | 6409.87a |           |
| 696.90 | 1157.84 | 1528.80 | 2177.52 | 2657.97 | 3445.30 | 3992.74 | 4513.08  | 6527.8a  |           |
| 714.51 | 1160.87 | 1532.02 | 2196.51 | 2679.93 | 3472.63 | 4003.29 | 4541.77  | 6529.63  |           |
| 732.55 | 1174.78 | 1536.95 | 2203.57 | 2691.64 | 3480.50 | 4093.63 | 4551a    | 6541.8a  |           |
| 747.55 | 1175.89 | 1552.20 | 2222.63 | 2692.03 | 3538.40 | 4125.60 | 4590.58  | 7183.24  |           |
| 760.48 | 1206.60 | 1584.95 | 2224.00 | 2693.78 | 3541.47 | 4131.65 | 4591.55  | 7297a    |           |
| 772.55 | 1210.81 | 1595.28 | 2230.47 | 2698.94 | 3544.86 | 4149.95 | 4611.39  | 7354a    |           |
| 773.53 | 1222.92 | 1612.13 | 2237.10 | 2707.65 | 3545.73 | 4151.63 | 4657.10  | 7801.58a |           |
